# Supplementary material
Source: PubMed Central journal article supplement (PMC6555646)

# Sordariaceae

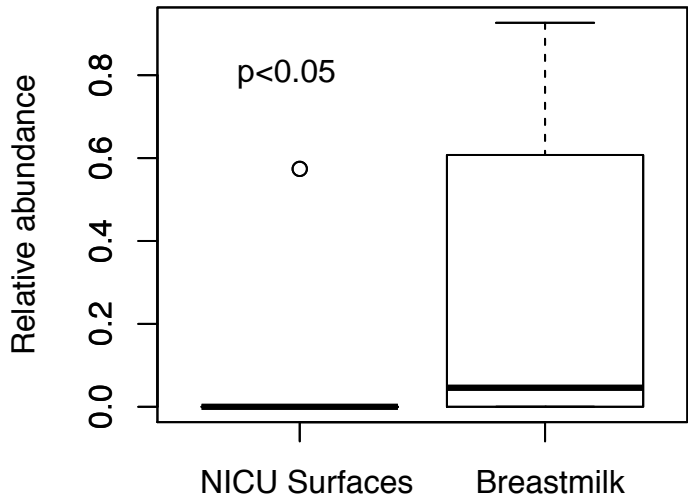

# Gelasinospora

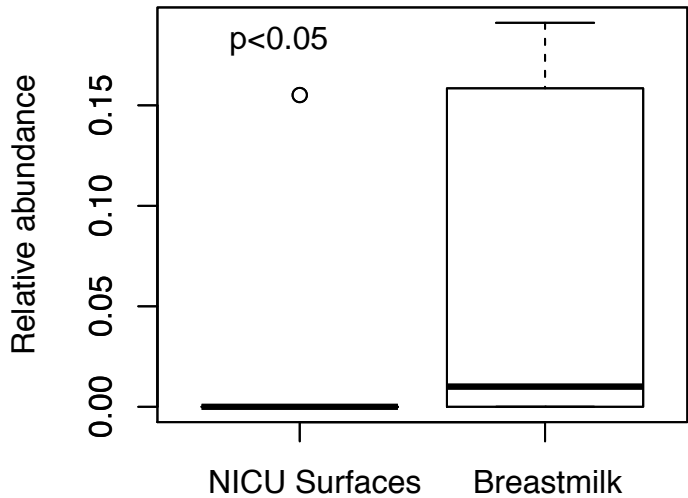

# Gibellulopsis

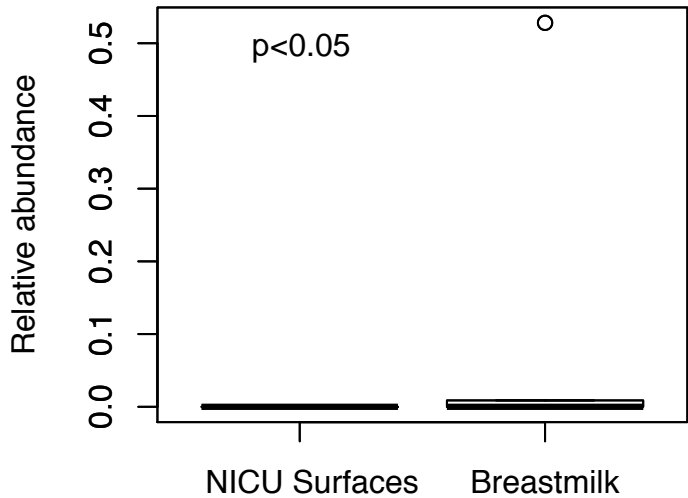

# Trichoderma

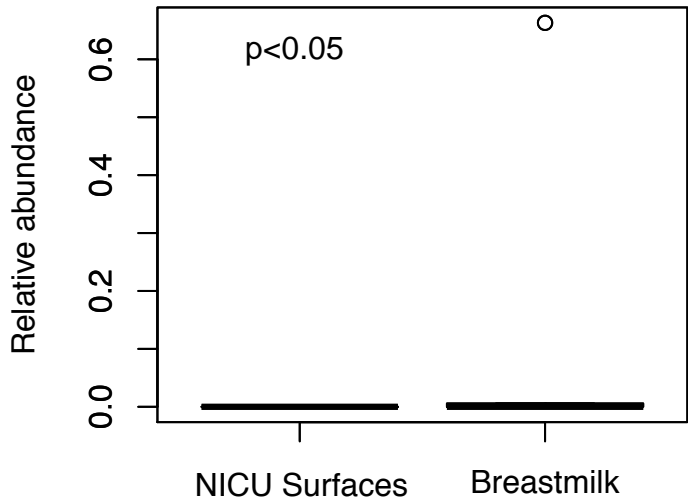

# *Vishniacozyma tephrensis*

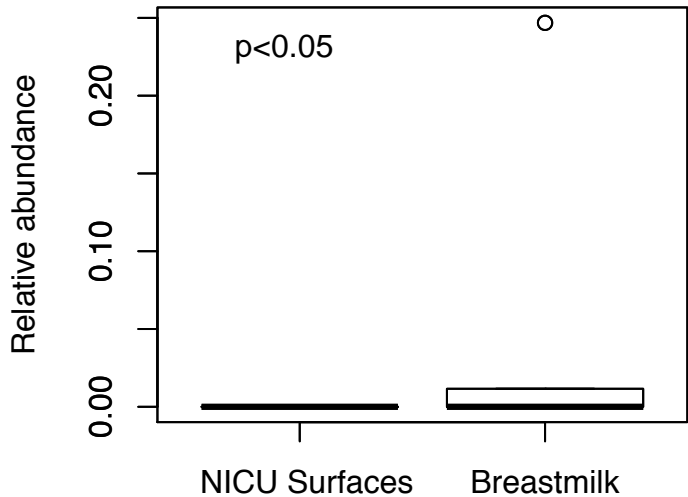

# *Sarocladium kiliense*

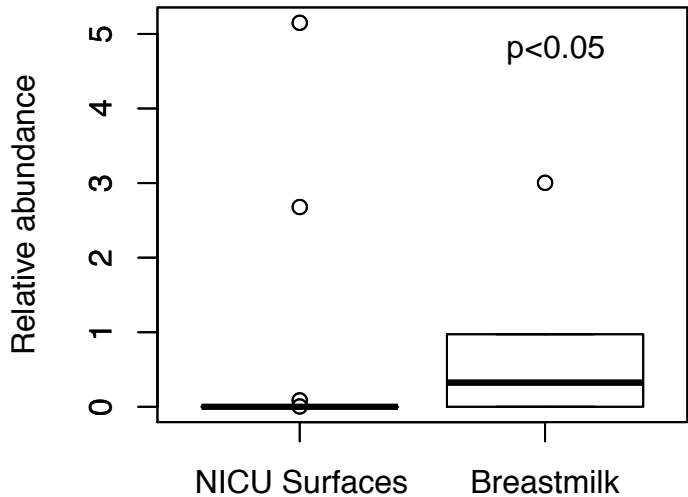

# *Aspergillus sydowii*

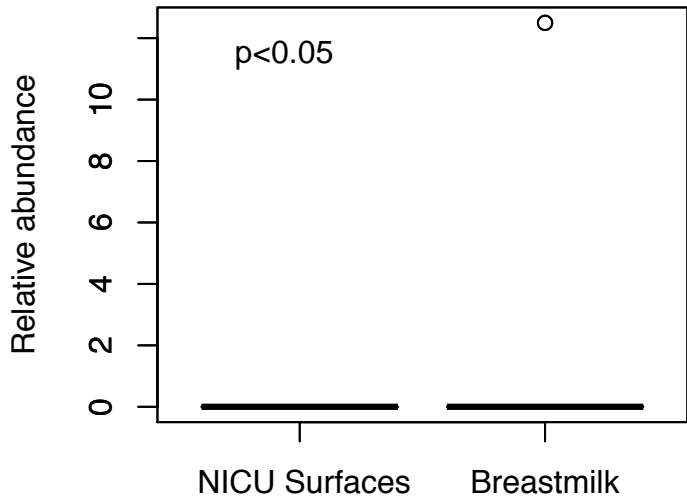

# Pseudeurotiaceae

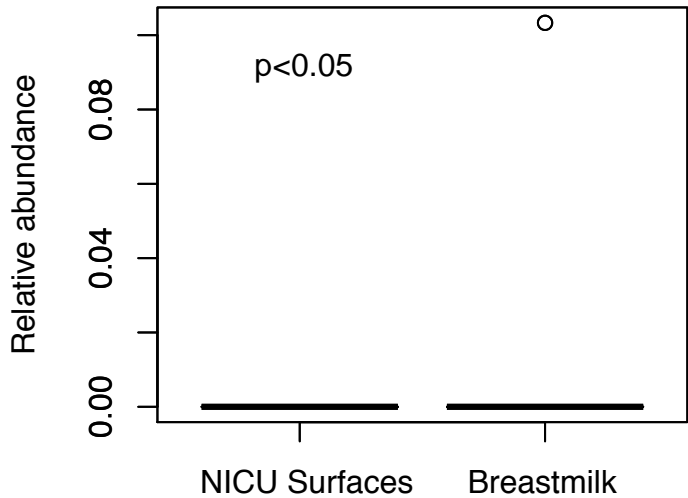



# *Pseudogymnoascus appendiculatus*

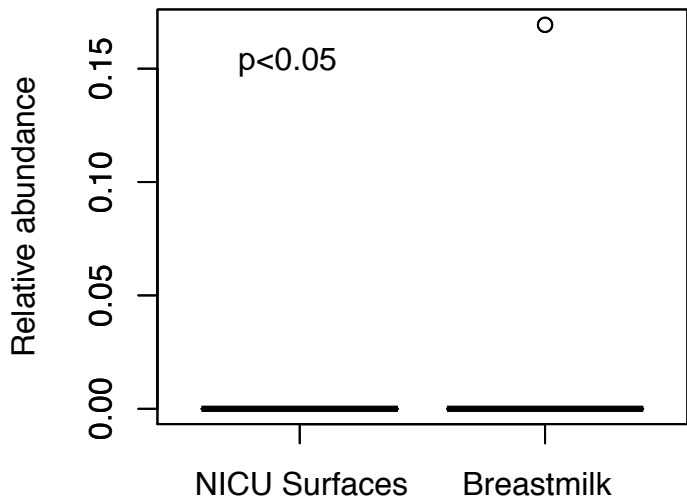

# *Fusarium fujikuroi*

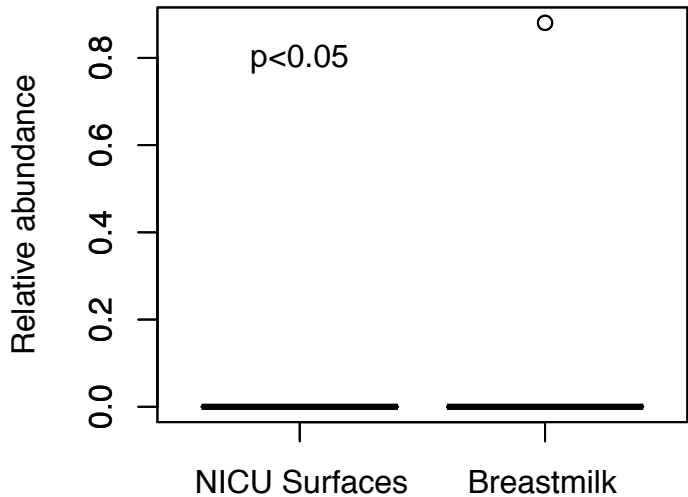

# *Holtermanniella takashimae*

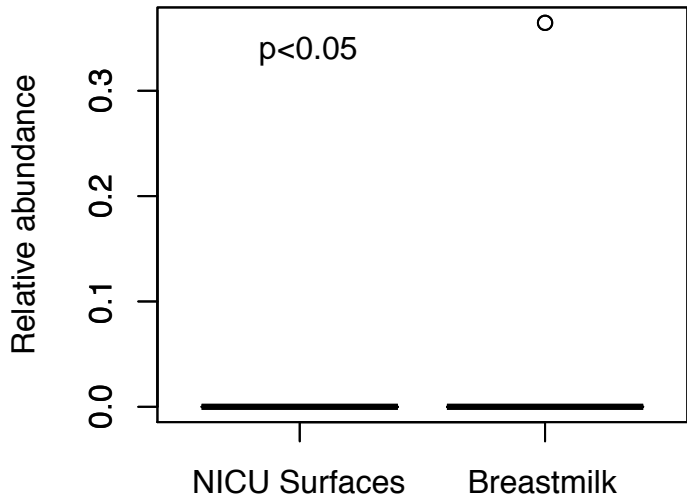

# Alternaria

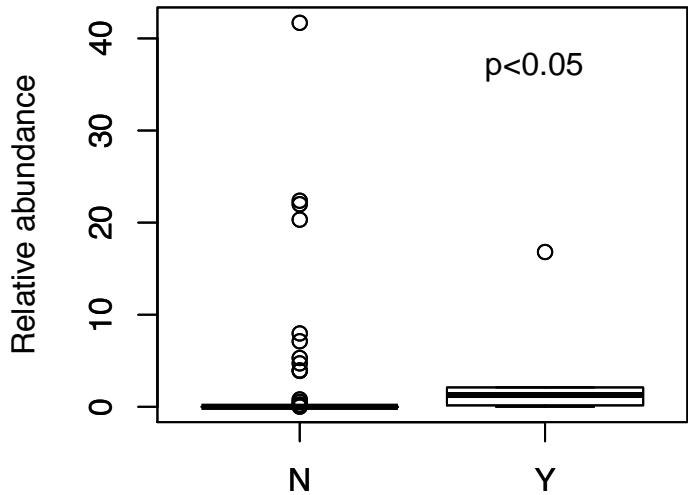

# Vishniacozyma

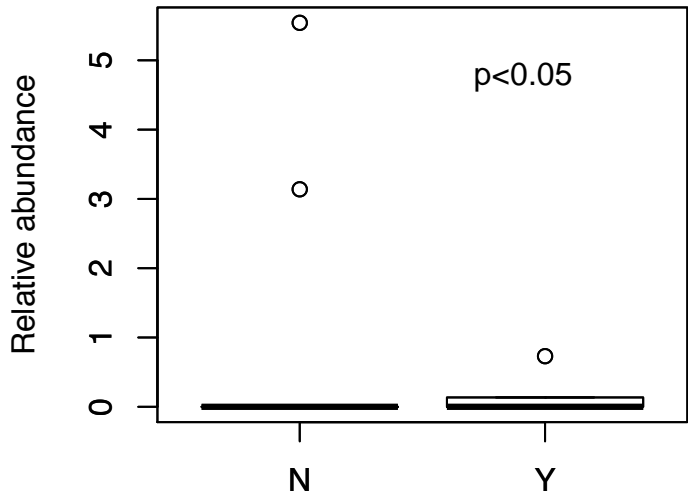

# Fusarium

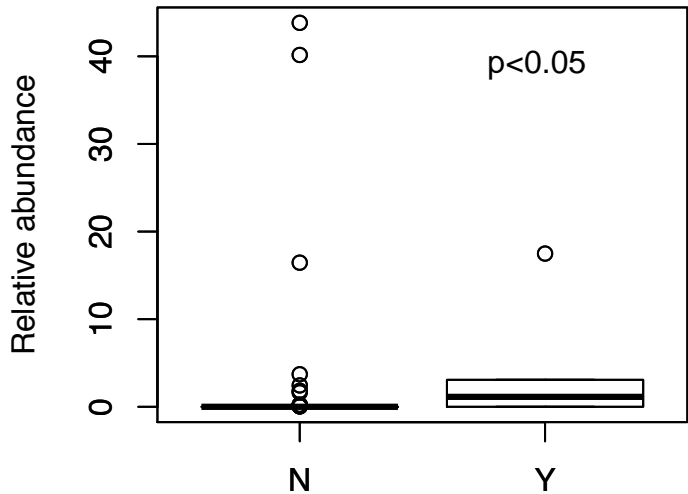



# *Cystofilobasidium infirmominiatum*

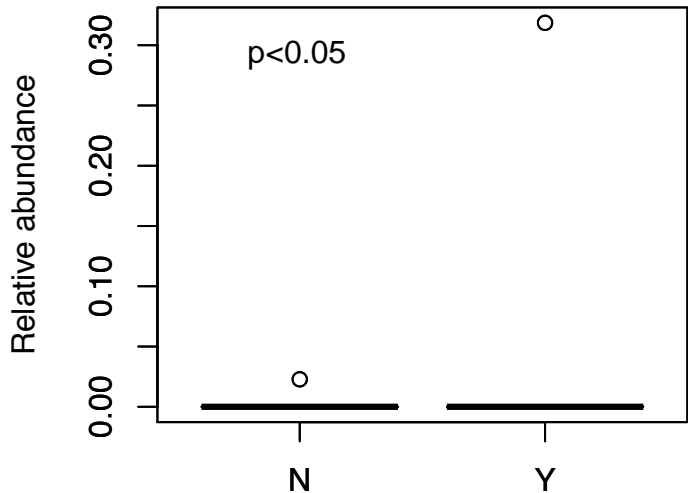



# *Bullera alba*

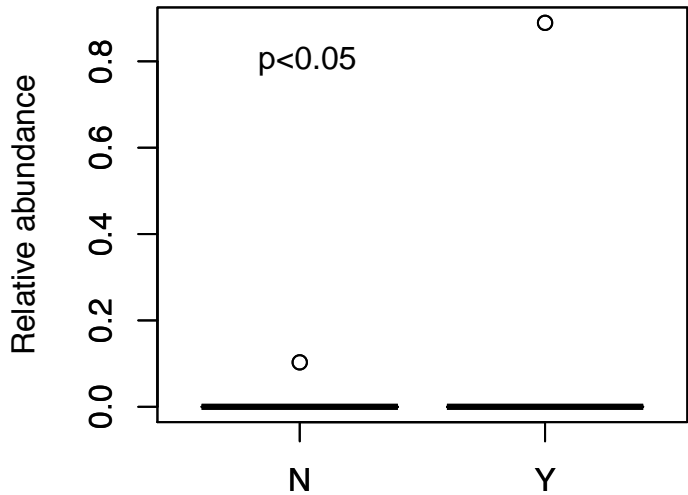

# *Cladosporium velox*

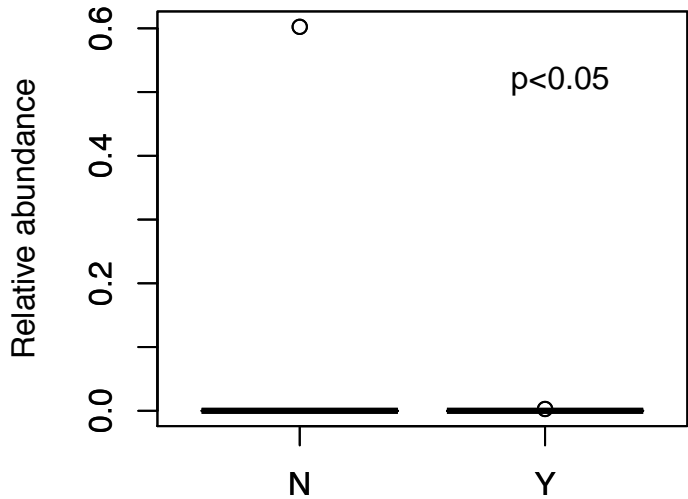

Supplement: NIHMS1525841-supplement-6.pdf [file NIHMS1525841-supplement-6.pdf]
